# Supplementary material for: Genotype-dependent Burst of Transposable Element Expression in Crowns of Hexaploid Wheat (Triticum aestivum L.) during Cold Acclimation
Source: Hindawi journal article supplement (doi:10.1155/2012/232530), 2012-01-01
Supplement: f1 [file 232530.f1.pdf]

Supplemental Data 1

| No. | Input Probe Set          | Cluster | Expression | TE annotation                                              |
|-----|--------------------------|---------|------------|------------------------------------------------------------|
| 1   | Ta.14430.1.S1_x_at       | 1       | 2.39       | Retrotransposon, LTR, Gypsy, "RLG_Cereba_AY040832-1"       |
| 2   | Ta.14430.3.A1_at         | 1       | 3.10       | Retrotransposon, LTR, Gypsy, "RLG_Cereba_AY040832-2"       |
| 3   | Ta.14586.1.A1_at         | 1       | 2.11       | Retrotransposon, LTR, Gypsy, "RLG_Sumaya_59e04-1"          |
| 4   | Ta.14586.2.A1_at         | 1       | 1.84       | Retrotransposon, LTR, Gypsy, "RLG_Sumaya_116F2-1"          |
| 5   | Ta.15005.1.S1_x_at       | 1       | 2.84       | DNA transposon, TIR, CACTA, "DTC_TAT5_464G14-1"            |
| 6   | Ta.16853.1.S1_at         | 1       | 2.31       | Retrotransposon, LTR, Gypsy, "RLG_Erika_consensus-1"       |
| 7   | Ta.17090.1.S1_at         | 1       | 3.31       | Retrotransposon, LTR, Gypsy, "RLG_Sabrina_D_AY146588-2"    |
| 8   | Ta.18921.1.S1_at         | 1       | 3.53       | Retrotransposon, LTR, unknown, "RLX_Xalax_9p13-1" solo-LTR |
| 9   | Ta.19680.1.A1_at         | 1       | 1.97       | Retrotransposon, LTR, Gypsy, "RLG_Sakura_10k23-4"          |
| 10  | Ta.20007.1.S1_at         | 1       | 1.77       | Retrotransposon, LTR, Gypsy, "RLG_Sumaya_59e04-1"          |
| 11  | Ta.24083.1.A1_at         | 1       | 3.14       | Retrotransposon, LTR, Gypsy, "RLG_Sabrina_C_AY494981-4"    |
| 12  | Ta.25001.1.A1_x_at       | 1       | 1.99       | Retrotransposon, LTR, Gypsy, "RLG_Sumaya_116F2-1"          |
| 13  | Ta.25005.1.A1_x_at       | 1       | 1.62       | DNA transposon, TIR, CACTA, "DTC_Clifford_consensus-1"     |
| 14  | Ta.30918.1.S1_at         | 1       | 2.03       | Retrotransposon, LTR, Gypsy, "RLG_Egug_EF067844-16"        |
| 15  | Ta.3312.2.S1_at          | 1       | 1.81       | Retrotransposon, LTR, Gypsy, "RLG_Sumaya_59e04-1"          |
| 16  | TaAffx.105253.1.S1_x_at  | 1       | 2.93       | Retrotransposon, LTR, Gypsy, "RLG_Quinta_10k23-1"          |
| 17  | TaAffx.105253.2.S1_x_at  | 1       | 2.73       | Retrotransposon, LTR, Gypsy, "RLG_Quinta_10k23-1"          |
| 18  | TaAffx.106461.1.S1_at    | 1       | 3.93       | Retrotransposon, LTR, Gypsy, "RLG_Derami_AY368673-1"       |
| 19  | TaAffx.108177.1.S1_at    | 1       | 2.60       | Retrotransposon, LTR, Gypsy, "RLG_Romani_B_64a5-1"         |
| 20  | TaAffx.108993.1.S1_at    | 1       | 2.00       | Retrotransposon, LTR, Gypsy, "RLG_Derami_AY368673-1"       |
| 21  | TaAffx.109030.1.S1_at    | 1       | 1.83       | DNA transposon, TIR, CACTA, "DTC_Jorge_59e04-1"            |
| 22  | TaAffx.109064.1.S1_at    | 1       | 2.37       | unknown, unknown, unknown, "XXX_unnamed_Z75561-1"          |
| 23  | TaAffx.109279.1.S1_at    | 1       | 2.91       | Retrotransposon, LTR, Gypsy, "RLG_Fatima_B_consensus-1"    |
| 24  | TaAffx.109695.1.S1_at    | 1       | 2.06       | DNA transposon, TIR, CACTA, "DTC_Pavel_AY188332-1"         |
| 25  | TaAffx.110026.1.S1_at    | 1       | 2.11       | DNA transposon, TIR, CACTA, "DTC_Jude_AF446141-1"          |
| 26  | TaAffx.110026.1.S1_x_at  | 1       | 1.68       | DNA transposon, TIR, CACTA, "DTC_Jude_AF446141-1"          |
| 27  | TaAffx.110794.1.S1_at    | 1       | 3.90       | DNA transposon, TIR, CACTA, "DTC_Pavel_AY188332-1"         |
| 28  | TaAffx.111080.1.S1_at    | 1       | 1.79       | DNA transposon, TIR, CACTA, "DTC_Jorge_59e04-1"            |
| 29  | TaAffx.111458.1.S1_at    | 1       | 1.89       | Retrotransposon, LTR, Gypsy, "RLG_Sumana_59e04-2"          |
| 30  | TaAffx.112335.1.S1_at    | 1       | 2.11       | DNA transposon, TIR, CACTA, "DTC_Conan_consensus-1"        |
| 31  | TaAffx.112844.1.S1_x_at  | 1       | 2.92       | Retrotransposon, LTR, Copia, "RLC_WIS_A_consensus-1"       |
| 32  | TaAffx.112844.3.S1_at    | 1       | 3.32       | Retrotransposon, LTR, Copia, "RLC_WIS_A_consensus-1"       |
| 33  | TaAffx.112844.3.S1_x_at  | 1       | 3.39       | Retrotransposon, LTR, Copia, "RLC_WIS_A_consensus-1"       |
| 34  | TaAffx.113761.1.S1_at    | 1       | 2.57       | DNA transposon, TIR, CACTA, "DTC_Jorge_231A16-1"           |
| 35  | TaAffx.113924.1.S1_at    | 1       | 1.97       | Retrotransposon, LTR, Gypsy, "RLG_Laura_consensus-1"       |
| 36  | TaAffx.113929.1.S1_at    | 1       | 2.03       | DNA transposon, TIR, CACTA, "DTC_Pavel_AY188332-1"         |
| 37  | TaAffx.120205.1.S1_at    | 1       | 3.73       | DNA transposon, TIR, CACTA, "DTC_Balduin_consensus-1"      |
| 38  | TaAffx.120212.2.S1_at    | 1       | 2.12       | Retrotransposon, LTR, Gypsy, "RLG_Laura_609E6-1"           |
| 39  | TaAffx.120239.1.S1_at    | 1       | 1.88       | Retrotransposon, LTR, Copia, "RLC_WIS_A_consensus-1"       |
| 40  | TaAffx.120239.1.S1_x_at  | 1       | 1.96       | Retrotransposon, LTR, Copia, "RLC_WIS_A_consensus-1"       |
| 41  | TaAffx.120260.1.S1_at    | 1       | 2.45       | Retrotransposon, LTR, Gypsy, "RLG_WHAM_consensus-1"        |
| 42  | TaAffx.124275.72.S1_at   | 1       | 1.78       | Retrotransposon, LTR, Gypsy, "RLG_Wilma_AY146588-3"        |
| 43  | TaAffx.128541.37.S1_x_at | 1       | 2.13       | Retrotransposon, LTR, Gypsy, "RLG_Sabrina_C_AY494981-4"    |
| 44  | TaAffx.128541.53.S1_at   | 1       | 1.87       | Retrotransposon, LTR, Gypsy, "RLG_Egug_AY268139-1"         |
| 45  | TaAffx.128541.55.S1_at   | 1       | 2.22       | Retrotransposon, LTR, Gypsy, "RLG_Sabrina_B_AY368673-1"    |
| 46  | TaAffx.128541.6.S1_at    | 1       | 3.42       | Retrotransposon, LTR, Gypsy, "RLG_Sabrina_D_AY146588-2"    |
| 47  | TaAffx.128541.9.S1_x_at  | 1       | 2.43       | Retrotransposon, LTR, Gypsy, "RLG_Sabrina_B_AY368673-1"    |
| 48  | TaAffx.134909.1.S1_at    | 1       | 1.80       | Retrotransposon, LTR, Gypsy, "RLG_Sumana_59e04-2"          |
| 49  | TaAffx.137.1.S1_at       | 1       | 1.78       | DNA transposon, TIR, CACTA, "DTC_Clifford_consensus-1"     |
| 50  | TaAffx.16070.1.S1_at     | 1       | 1.78       | DNA transposon, TIR, CACTA, "DTC_Jorge_59e04-1"            |
| 51  | TaAffx.1861.5.S1_x_at    | 1       | 2.69       | Retrotransposon, LTR, Copia, "RLC_WIS_A_consensus-1"       |
| 52  | TaAffx.1861.9.S1_x_at    | 1       | 2.16       | Retrotransposon, LTR, Copia, "RLC_WIS_B_consensus-1"       |
| 53  | TaAffx.22.1.A1_at        | 1       | 1.90       | DNA transposon, TIR, Mariner, "DTT_Thalos_consensus-1"     |
| 54  | TaAffx.23084.3.S1_at     | 1       | 2.38       | Retrotransposon, LTR, Gypsy, "RLG_Quinta_10k23-1"          |
| 55  | TaAffx.23084.3.S1_x_at   | 1       | 3.76       | Retrotransposon, LTR, Gypsy, "RLG_Quinta_10k23-1"          |
| 56  | TaAffx.23114.1.S1_at     | 1       | 2.07       | Retrotransposon, LTR, Gypsy, "RLG_Fatima_B_consensus-1"    |
| 57  | TaAffx.23129.1.S1_at     | 1       | 2.01       | DNA transposon, TIR, CACTA, "DTC_Jorge_231A16-1"           |
| 58  | TaAffx.23589.1.S1_at     | 1       | 2.00       | DNA transposon, TIR, CACTA, "DTC_Jorge_59e04-1"            |
| 59  | TaAffx.24523.1.S1_at     | 1       | 1.72       | Retrotransposon, LTR, Gypsy, "RLG_Quinta_10k23-1"          |
| 60  | TaAffx.24531.1.S1_at     | 1       | 2.58       | Retrotransposon, LTR, Gypsy, "RLG_Fatima_consensus-1"      |
| 61  | TaAffx.25548.1.S1_at     | 1       | 1.94       | Retrotransposon, LTR, Gypsy, "RLG_Sumana_59e04-2"          |

|     |                        |   |      |                                                            |
|-----|------------------------|---|------|------------------------------------------------------------|
| 62  | TaAffx.25575.1.S1_at   | 1 | 2.01 | Retrotransposon, LTR, Gypsy, "RLG_WHAM_consensus-1"        |
| 63  | TaAffx.25679.1.S1_at   | 1 | 2.23 | Retrotransposon, LTR, Copia, "RLC_Angela_B_consensus-1"    |
| 64  | TaAffx.25679.1.S1_x_at | 1 | 2.18 | Retrotransposon, LTR, Copia, "RLC_Angela_B_consensus-1"    |
| 65  | TaAffx.25683.1.S1_at   | 1 | 1.67 | Retrotransposon, LTR, Gypsy, "RLG_Sakura_115G1-1"          |
| 66  | TaAffx.25699.1.S1_at   | 1 | 1.84 | DNA transposon, TIR, CACTA, "DTC_Jorge_59e04-1"            |
| 67  | TaAffx.25951.1.S1_at   | 1 | 2.95 | Retrotransposon, LTR, Copia, "RLC_WIS_A_consensus-1"       |
| 68  | TaAffx.26038.1.S1_at   | 1 | 1.68 | Retrotransposon, LTR, Copia, "RLC_Angela_A_consensus-1"    |
| 69  | TaAffx.26629.1.S1_at   | 1 | 2.22 | Retrotransposon, LTR, Gypsy, "RLG_Romana_AF459088-2"       |
| 70  | TaAffx.27006.1.S1_at   | 1 | 3.85 | Retrotransposon, LTR, Copia, "RLC_Angela_B_consensus-1"    |
| 71  | TaAffx.27144.1.S1_at   | 1 | 3.57 | DNA transposon, TIR, Harbinger, "DTH_Orpheus_consensus-1"  |
| 72  | TaAffx.27399.1.S1_at   | 1 | 1.70 | Retrotransposon, LTR, Copia, "RLC_TAR2_AY853252-1" ?       |
| 73  | TaAffx.28165.1.S1_at   | 1 | 2.11 | Retrotransposon, LTR, Gypsy, "RLG_Sakura_115G1-1"          |
| 74  | TaAffx.29078.1.S1_at   | 1 | 2.46 | DNA transposon, TIR, Harbinger, "DTH_Kerberos_consensus-1" |
| 75  | TaAffx.29302.1.S1_at   | 1 | 2.04 | Retrotransposon, LTR, Copia, "RLC_WIS_B_consensus-1"       |
| 76  | TaAffx.29362.1.S1_at   | 1 | 2.65 | Retrotransposon, LTR, Copia, "RLC_Angela_A_consensus-1"    |
| 77  | TaAffx.29664.1.S1_at   | 1 | 1.76 | Retrotransposon, LTR, Gypsy, "RLG_Fatima_B_consensus-1"    |
| 78  | TaAffx.30466.1.S1_at   | 1 | 1.63 | Retrotransposon, LTR, Gypsy, "RLG_Wilma_AY494981-2"        |
| 79  | TaAffx.30561.1.S1_at   | 1 | 2.16 | Retrotransposon, LTR, Gypsy, "RLG_Laura_609E6-1"           |
| 80  | TaAffx.30561.1.S1_x_at | 1 | 1.73 | Retrotransposon, LTR, Gypsy, "RLG_Laura_609E6-1"           |
| 81  | TaAffx.30783.1.S1_at   | 1 | 2.48 | Retrotransposon, LTR, Gypsy, "RLG_BAGY2_consensus-1"       |
| 82  | TaAffx.31309.1.S1_at   | 1 | 2.86 | DNA transposon, TIR, CACTA, "DTC_Jorge_59e04-1"            |
| 83  | TaAffx.31410.1.S1_at   | 1 | 2.07 | Retrotransposon, LTR, Gypsy, "RLG_Sumaya_59e04-1"          |
| 84  | TaAffx.31443.1.S1_at   | 1 | 2.00 | Retrotransposon, LTR, Gypsy, "RLG_Sumana_59e04-2"          |
| 85  | TaAffx.31501.1.S1_at   | 1 | 3.41 | Retrotransposon, LTR, Gypsy, "RLG_Sakura_115G1-1"          |
| 86  | TaAffx.31539.1.S1_at   | 1 | 1.81 | Retrotransposon, LTR, Copia, "RLC_Sasanda_EU157184-1"      |
| 87  | TaAffx.31561.1.S1_at   | 1 | 2.51 | Retrotransposon, LTR, Gypsy, "RLG_Romani_AF459088-1"       |
| 88  | TaAffx.31839.1.S1_at   | 1 | 1.65 | Retrotransposon, LTR, Gypsy, "RLG_Wilma_AY494981-2"        |
| 89  | TaAffx.31867.1.S1_at   | 1 | 2.64 | Retrotransposon, LTR, Gypsy, "RLG_Egug_EF067844-16"        |
| 90  | TaAffx.31972.1.S1_at   | 1 | 2.51 | Retrotransposon, LTR, Gypsy, "RLG_Danae_consensus-1"       |
| 91  | TaAffx.47708.1.S1_at   | 1 | 1.76 | DNA transposon, TIR, CACTA, "DTC_Jorge_AF326781-1"         |
| 92  | TaAffx.53280.1.S1_at   | 1 | 2.68 | Retrotransposon, LTR, Copia, "RLC_Angela_A_consensus-1"    |
| 93  | TaAffx.53317.1.S1_at   | 1 | 2.21 | Retrotransposon, LTR, Gypsy, "RLG_Sabrina_consensus-1"     |
| 94  | TaAffx.54404.1.S1_at   | 1 | 2.62 | Retrotransposon, LTR, Copia, "RLC_Valerie_AY661558-2"      |
| 95  | TaAffx.54410.1.S1_at   | 1 | 1.64 | Retrotransposon, LTR, Gypsy, "RLG_Carmilla_consensus-1"    |
| 96  | TaAffx.54439.1.S1_at   | 1 | 2.04 | Retrotransposon, LTR, Gypsy, "RLG_Latidu_10k23-1"          |
| 97  | TaAffx.54442.1.S1_at   | 1 | 2.06 | DNA transposon, TIR, CACTA, "DTC_Sherlock_consensus-1"     |
| 98  | TaAffx.54490.1.S1_at   | 1 | 2.79 | Retrotransposon, LTR, Gypsy, "RLG_Sabrina_C_210J24-2"      |
| 99  | TaAffx.54534.1.S1_at   | 1 | 1.96 | DNA transposon, TIR, CACTA, "DTC_Jorge_59e04-1"            |
| 100 | TaAffx.56188.1.S1_at   | 1 | 2.00 | Retrotransposon, LTR, Gypsy, "RLG_Wilma_AY494981-2"        |
| 101 | TaAffx.56188.1.S1_x_at | 1 | 2.09 | Retrotransposon, LTR, Gypsy, "RLG_Wilma_AY494981-2"        |
| 102 | TaAffx.56371.1.S1_at   | 1 | 2.38 | DNA transposon, TIR, CACTA, "DTC_TAT5_464G14-1"            |
| 103 | TaAffx.56411.1.S1_at   | 1 | 3.67 | Retrotransposon, LTR, Gypsy, "RLG_Sabrina_B_AY368673-1"    |
| 104 | TaAffx.56527.1.S1_at   | 1 | 2.78 | Retrotransposon, LTR, Copia, "RLC_WIS_B_consensus-1"       |
| 105 | TaAffx.56527.1.S1_x_at | 1 | 3.46 | Retrotransposon, LTR, Copia, "RLC_WIS_B_consensus-1"       |
| 106 | TaAffx.56833.1.S1_at   | 1 | 2.15 | Retrotransposon, LTR, Gypsy, "RLG_Sabrina_B_AY368673-1"    |
| 107 | TaAffx.56902.1.S1_at   | 1 | 1.88 | DNA transposon, TIR, CACTA, "DTC_Jorge_AF326781-1"         |
| 108 | TaAffx.57036.1.S1_at   | 1 | 2.34 | Retrotransposon, LTR, Gypsy, "RLG_Lila_42j2-3"             |
| 109 | TaAffx.58148.1.S1_at   | 1 | 2.13 | Retrotransposon, LTR, Gypsy, "RLG_Romani_10k23-3"          |
| 110 | TaAffx.58384.1.S1_at   | 1 | 1.77 | Retrotransposon, LTR, Copia, "RLC_WIS_A_consensus-1"       |
| 111 | TaAffx.58444.1.S1_at   | 1 | 3.15 | Retrotransposon, LTR, Gypsy, "RLG_Cereba_AY040832-1"       |
| 112 | TaAffx.58457.1.S1_x_at | 1 | 2.85 | Retrotransposon, LTR, Gypsy, "RLG_Sabrina_D_AY146588-2"    |
| 113 | TaAffx.58636.1.S1_at   | 1 | 2.05 | Retrotransposon, LTR, Gypsy, "RLG_Derami_A_AY188333-1"     |
| 114 | TaAffx.58770.1.S1_at   | 1 | 2.01 | Retrotransposon, LTR, Gypsy, "RLG_Fatima_consensus-1"      |
| 115 | TaAffx.58779.1.S1_at   | 1 | 3.57 | Retrotransposon, LTR, Gypsy, "RLG_Wilma_AY494981-2"        |
| 116 | TaAffx.59315.1.S1_at   | 1 | 3.83 | DNA transposon, TIR, CACTA, "DTC_Conan_consensus-1"        |
| 117 | TaAffx.59390.1.S1_at   | 1 | 2.51 | DNA transposon, TIR, CACTA, "DTC_Jorge_59e04-1"            |
| 118 | TaAffx.5942.1.S1_at    | 1 | 2.52 | DNA transposon, TIR, CACTA, "DTC_Balduin_consensus-1"      |
| 119 | TaAffx.64697.1.S1_at   | 1 | 2.48 | Retrotransposon, LTR, Gypsy, "RLG_Laura_consensus-1"       |
| 120 | TaAffx.65606.1.S1_at   | 1 | 3.14 | Retrotransposon, LTR, Copia, "RLC_WIS_B_consensus-1"       |
| 121 | TaAffx.65702.1.S1_at   | 1 | 1.97 | Retrotransposon, LTR, Gypsy, "RLG_Sumaya_59e04-1"          |
| 122 | TaAffx.6588.1.S1_at    | 1 | 2.37 | Retrotransposon, LTR, Copia, "RLC_Maximus_consensus-1"     |
| 123 | TaAffx.6630.1.S1_at    | 1 | 1.71 | Retrotransposon, LTR, Gypsy, "RLG_Fatima_B_consensus-1"    |
| 124 | TaAffx.6657.1.S1_at    | 1 | 1.68 | Retrotransposon, LTR, Gypsy, "RLG_Fatima_B_consensus-1"    |
| 125 | TaAffx.6759.1.S1_at    | 1 | 1.69 | DNA transposon, TIR, CACTA, "DTC_Conan_consensus-1"        |

|     |                         |   |       |                                                            |
|-----|-------------------------|---|-------|------------------------------------------------------------|
| 126 | TaAffx.69933.5.A1_at    | 1 | 2.81  | Retrotransposon, LTR, Copia, "RLC_WIS_A_consensus-1"       |
| 127 | TaAffx.70061.12.S1_at   | 1 | 2.24  | Retrotransposon, LTR, Gypsy, "RLG_Erika_consensus-1"       |
| 128 | TaAffx.70061.14.A1_at   | 1 | 2.33  | Retrotransposon, LTR, Gypsy, "RLG_Sumaya_116F2-1"          |
| 129 | TaAffx.70061.17.S1_at   | 1 | 1.88  | Retrotransposon, LTR, Gypsy, "RLG_Sumaya_59e04-1"          |
| 130 | TaAffx.70061.28.S1_at   | 1 | 4.04  | Retrotransposon, LTR, Gypsy, "RLG_Sumaya_59e04-1"          |
| 131 | TaAffx.70061.8.S1_at    | 1 | 2.03  | Retrotransposon, LTR, Gypsy, "RLG_Sumana_59e04-2"          |
| 132 | TaAffx.7031.1.S1_at     | 1 | 2.25  | Retrotransposon, LTR, Gypsy, "RLG_Wilma_AY146588-3"        |
| 133 | TaAffx.70805.1.A1_at    | 1 | 1.65  | DNA transposon, TIR, CACTA, "DTC_Enac_AY146588-1"          |
| 134 | TaAffx.7157.1.S1_at     | 1 | 2.51  | Retrotransposon, LTR, Gypsy, "RLG_Sabrina_C_210J24-2"      |
| 135 | TaAffx.74416.6.A1_at    | 1 | 3.18  | Retrotransposon, LTR, Gypsy, "RLG_Sabrina_C_210J24-2"      |
| 136 | TaAffx.76.4.S1_at       | 1 | 2.53  | Retrotransposon, LTR, Gypsy, "RLG_Egug_AY268139-1"         |
| 137 | TaAffx.76.4.S1_x_at     | 1 | 4.10  | Retrotransposon, LTR, Gypsy, "RLG_Egug_AY268139-1"         |
| 138 | TaAffx.7624.1.S1_at     | 1 | 2.02  | Retrotransposon, LTR, Gypsy, "RLG_Derami_AY368673-1"       |
| 139 | TaAffx.7664.1.S1_at     | 1 | 2.11  | Retrotransposon, LTR, unknown, "RLX_Xalax_9p13-1" solo-LTR |
| 140 | TaAffx.7704.1.S1_at     | 1 | 3.88  | DNA transposon, TIR, CACTA, "DTC_Pavel_AY188332-1"         |
| 141 | TaAffx.77470.1.A1_at    | 1 | 3.88  | unknown, unknown, unknown, "XXX_lapetus_103H9-1"           |
| 142 | TaAffx.78045.1.S1_at    | 1 | 3.95  | DNA transposon, TIR, CACTA, "DTC_Byron_AY146587-2"         |
| 143 | TaAffx.78249.1.S1_at    | 1 | 2.21  | Retrotransposon, LINE, unknown, "RIX_Stasy_294D11-1"       |
| 144 | TaAffx.7866.1.S1_at     | 1 | 1.87  | Retrotransposon, LTR, Gypsy, "RLG_Laura_609E6-1"           |
| 145 | TaAffx.79902.1.S1_at    | 1 | 2.25  | DNA transposon, TIR, CACTA, "DTC_TAT1_AF459088-1"          |
| 146 | TaAffx.80312.1.S1_x_at  | 1 | 1.95  | Retrotransposon, LTR, Gypsy, "RLG_Sabrina_C_AY494981-4"    |
| 147 | TaAffx.80328.1.S1_at    | 1 | 1.81  | DNA transposon, TIR, CACTA, "DTC_Boris_59e04-1"            |
| 148 | TaAffx.80366.1.S1_at    | 1 | 1.84  | Retrotransposon, LTR, Copia, "RLC_Angela_B_consensus-1"    |
| 149 | TaAffx.80413.1.S1_at    | 1 | 2.15  | Retrotransposon, LTR, Gypsy, "RLG_Fatima_consensus-1"      |
| 150 | TaAffx.8047.1.S1_at     | 1 | 3.50  | Retrotransposon, LTR, Gypsy, "RLG_Egug_AY268139-1"         |
| 151 | TaAffx.80578.1.S1_at    | 1 | 3.39  | Retrotransposon, LTR, Gypsy, "RLG_Wilma_AY494981-2"        |
| 152 | TaAffx.80928.1.S1_at    | 1 | 2.50  | Retrotransposon, LTR, Gypsy, "RLG_Laura_609E6-1"           |
| 153 | TaAffx.82073.1.S1_at    | 1 | 3.07  | Retrotransposon, LTR, Copia, "RLC_Maximus_consensus-1"     |
| 154 | TaAffx.82125.1.S1_at    | 1 | 1.80  | Retrotransposon, LTR, Gypsy, "RLG_Sabrina_D_115G1-2"       |
| 155 | TaAffx.82624.1.S1_at    | 1 | 2.97  | Retrotransposon, LTR, Gypsy, "RLG_Sabrina_D_AY146588-2"    |
| 156 | TaAffx.83311.1.S1_x_at  | 1 | 2.82  | Retrotransposon, LTR, Gypsy, "RLG_Sumana_59e04-2"          |
| 157 | TaAffx.83778.1.S1_at    | 1 | 3.80  | Retrotransposon, LTR, Copia, "RLC_WIS_A_consensus-1"       |
| 158 | TaAffx.83873.1.S1_at    | 1 | 1.84  | Retrotransposon, LTR, Gypsy, "RLG_Sabrina_C_AY494981-4"    |
| 159 | TaAffx.83915.1.S1_at    | 1 | 2.41  | Retrotransposon, LTR, Gypsy, "RLG_Romana_AF459088-2"       |
| 160 | TaAffx.83941.1.S1_at    | 1 | 3.18  | DNA transposon, TIR, CACTA, "DTC_Clifford_consensus-1"     |
| 161 | TaAffx.84030.1.S1_at    | 1 | 1.80  | Retrotransposon, LTR, Gypsy, "RLG_Olivia_10k23-1"          |
| 162 | TaAffx.84031.1.S1_at    | 1 | 1.68  | Retrotransposon, LTR, Gypsy, "RLG_Fatima_consensus-1"      |
| 163 | TaAffx.84049.1.S1_at    | 1 | 2.31  | Retrotransposon, LTR, Gypsy, "RLG_Laura_609E6-1"           |
| 164 | TaAffx.84323.1.S1_at    | 1 | 2.51  | Retrotransposon, LTR, Gypsy, "RLG_Romana_AF459088-2"       |
| 165 | TaAffx.85099.1.S1_at    | 1 | 2.12  | Retrotransposon, LTR, Gypsy, "RLG_Nusif_AY494981-1"        |
| 166 | TaAffx.86127.1.S1_at    | 1 | 1.64  | Retrotransposon, LTR, Copia, "RLC_Maximus_consensus-1"     |
| 167 | TaAffx.8798.1.S1_at     | 1 | 1.86  | Retrotransposon, LTR, Gypsy, "RLG_Fatima_consensus-1"      |
| 168 | TaAffx.89491.1.S1_at    | 1 | 1.92  | Retrotransposon, LTR, Copia, "RLC_Maximus_consensus-1"     |
| 169 | TaAffx.8981.1.S1_at     | 1 | 2.43  | Retrotransposon, LTR, Gypsy, "RLG_Wilma_AY494981-2"        |
| 170 | TaAffx.9030.1.S1_at     | 1 | 2.96  | Retrotransposon, LTR, Copia, "RLC_Angela_B_consensus-1"    |
| 171 | TaAffx.93242.1.A1_at    | 1 | 1.97  | Retrotransposon, LTR, Copia, "RLC_unnamed_42j2-1" fragment |
| 172 | TaAffx.97265.1.S1_x_at  | 1 | 2.78  | Retrotransposon, LTR, Gypsy, "RLG_Fatima_B_consensus-1"    |
| 173 | TaAffx.97289.1.S1_at    | 1 | 3.31  | Retrotransposon, LTR, Gypsy, "RLG_Laura_consensus-1"       |
| 174 | TaAffx.9856.1.S1_at     | 1 | 3.55  | Retrotransposon, LTR, Gypsy, "RLG_Sabrina_D_AY146588-2"    |
| 175 | Ta.20297.1.S1_at        | 2 | 25.09 | Retrotransposon, LTR, Gypsy, "RLG_WHAM_consensus-1"        |
| 176 | Ta.21696.1.S1_at        | 2 | 9.47  | Retrotransposon, LTR, Gypsy, "RLG_Romana_AY494981-1"       |
| 177 | TaAffx.105253.2.S1_at   | 2 | 4.23  | Retrotransposon, LTR, Gypsy, "RLG_Quinta_10k23-1"          |
| 178 | TaAffx.108987.1.S1_at   | 2 | 12.21 | Retrotransposon, LTR, Gypsy, "RLG_Wilma_AY494981-2"        |
| 179 | TaAffx.109002.1.S1_at   | 2 | 5.01  | DNA transposon, TIR, CACTA, "DTC_Jorge_59e04-1"            |
| 180 | TaAffx.109079.1.S1_at   | 2 | 6.73  | DNA transposon, TIR, CACTA, "DTC_Clifford_consensus-1"     |
| 181 | TaAffx.109268.1.S1_at   | 2 | 13.45 | Retrotransposon, LTR, Gypsy, "RLG_Wilma_AY494981-2"        |
| 182 | TaAffx.109268.1.S1_x_at | 2 | 6.41  | Retrotransposon, LTR, Gypsy, "RLG_Wilma_AY146588-3"        |
| 183 | TaAffx.110754.1.S1_at   | 2 | 13.11 | Retrotransposon, LTR, Gypsy, "RLG_Sumana_59e04-2"          |
| 184 | TaAffx.111008.1.S1_at   | 2 | 5.45  | Retrotransposon, LTR, Gypsy, "RLG_Sabrina_B_AY368673-1"    |
| 185 | TaAffx.112770.1.S1_at   | 2 | 5.27  | Retrotransposon, LTR, Copia, "RLC_Angela_B_consensus-1"    |
| 186 | TaAffx.112770.1.S1_x_at | 2 | 9.36  | Retrotransposon, LTR, Copia, "RLC_Angela_B_consensus-1"    |
| 187 | TaAffx.113515.1.S1_at   | 2 | 8.44  | DNA transposon, TIR, CACTA, "DTC_Jorge_AF326781-1"         |
| 188 | TaAffx.128541.51.S1_at  | 2 | 7.79  | Retrotransposon, LTR, Gypsy, "RLG_Sabrina_B_AY368673-1"    |
| 189 | TaAffx.128541.59.A1_at  | 2 | 7.45  | Retrotransposon, LTR, Gypsy, "RLG_Sabrina_C_AY494981-4"    |

|     |                          |   |       |                                                         |
|-----|--------------------------|---|-------|---------------------------------------------------------|
| 190 | TaAffx.128541.69.S1_at   | 2 | 20.36 | Retrotransposon, LTR, Gypsy, "RLG_Sabrina_D_AY146588-2" |
| 191 | TaAffx.128541.69.S1_x_at | 2 | 18.90 | Retrotransposon, LTR, Gypsy, "RLG_Sabrina_D_AY146588-2" |
| 192 | TaAffx.133843.2.S1_at    | 2 | 6.73  | Retrotransposon, LTR, Gypsy, "RLG_Sabrina_D_115G1-2"    |
| 193 | TaAffx.23084.1.S1_at     | 2 | 8.71  | Retrotransposon, LTR, Gypsy, "RLG_Quinta_10k23-1"       |
| 194 | TaAffx.23084.1.S1_x_at   | 2 | 9.28  | Retrotransposon, LTR, Gypsy, "RLG_Quinta_10k23-1"       |
| 195 | TaAffx.23114.2.S1_at     | 2 | 5.30  | Retrotransposon, LTR, Gypsy, "RLG_Fatima_B_consensus-1" |
| 196 | TaAffx.23214.1.S1_at     | 2 | 11.82 | Retrotransposon, LTR, Gypsy, "RLG_Cereba_AY040832-2"    |
| 197 | TaAffx.24514.2.S1_at     | 2 | 8.15  | Retrotransposon, LTR, Gypsy, "RLG_Cereba_AY040832-2"    |
| 198 | TaAffx.25602.1.S1_s_at   | 2 | 16.54 | Retrotransposon, LTR, Copia, "RLC_Eugene_consensus-1"   |
| 199 | TaAffx.27004.1.S1_at     | 2 | 4.65  | DNA transposon, TIR, CACTA, "DTC_Fergat_42j2-4"         |
| 200 | TaAffx.27015.1.S1_at     | 2 | 4.39  | Retrotransposon, LTR, Gypsy, "RLG_Cereba_AY040832-1"    |
| 201 | TaAffx.27375.1.S1_at     | 2 | 12.67 | DNA transposon, TIR, CACTA, "DTC_Jorge_AF326781-1"      |
| 202 | TaAffx.28526.1.S1_at     | 2 | 5.08  | Retrotransposon, LTR, Gypsy, "RLG_Romana_AY494981-1"    |
| 203 | TaAffx.30272.3.A1_at     | 2 | 5.20  | Retrotransposon, LTR, Copia, "RLC_Angela_B_consensus-1" |
| 204 | TaAffx.31295.1.S1_at     | 2 | 4.95  | Retrotransposon, LTR, Gypsy, "RLG_Sabrina_consensus-1"  |
| 205 | TaAffx.32091.1.S1_at     | 2 | 21.01 | DNA transposon, TIR, CACTA, "DTC_Jorge_AF326781-1"      |
| 206 | TaAffx.32098.1.S1_at     | 2 | 4.76  | Retrotransposon, LTR, Gypsy, "RLG_Wilma_AY494981-2"     |
| 207 | TaAffx.52994.1.S1_at     | 2 | 7.22  | Retrotransposon, LTR, Copia, "RLC_Angela_B_consensus-1" |
| 208 | TaAffx.53736.1.S1_at     | 2 | 8.78  | Retrotransposon, LTR, Gypsy, "RLG_Romani_10k23-3"       |
| 209 | TaAffx.54173.1.S1_at     | 2 | 4.71  | Retrotransposon, LTR, Gypsy, "RLG_Sakura_115G1-1"       |
| 210 | TaAffx.54175.1.S1_at     | 2 | 4.95  | Retrotransposon, LTR, Gypsy, "RLG_Sakura_10k23-4"       |
| 211 | TaAffx.56355.1.S1_at     | 2 | 8.33  | Retrotransposon, LTR, Gypsy, "RLG_Wilma_AY494981-2"     |
| 212 | TaAffx.58547.1.S1_at     | 2 | 7.11  | Retrotransposon, LTR, Copia, "RLC_Angela_B_consensus-1" |
| 213 | TaAffx.5865.2.A1_at      | 2 | 16.57 | Retrotransposon, LTR, Gypsy, "RLG_Sakura_10k23-4"       |
| 214 | TaAffx.59361.1.S1_at     | 2 | 4.52  | Retrotransposon, LTR, Gypsy, "RLG_Sakura_10k23-4"       |
| 215 | TaAffx.62172.1.S1_at     | 2 | 6.77  | Retrotransposon, LTR, Copia, "RLC_WIS_B_consensus-1"    |
| 216 | TaAffx.65642.1.S1_at     | 2 | 7.93  | Retrotransposon, LTR, Gypsy, "RLG_WHAM_consensus-1"     |
| 217 | TaAffx.65643.1.S1_at     | 2 | 4.90  | DNA transposon, TIR, CACTA, "DTC_Jorge_59e04-1"         |
| 218 | TaAffx.65647.1.S1_at     | 2 | 4.50  | Retrotransposon, LTR, Copia, "RLC_WIS_A_consensus-1"    |
| 219 | TaAffx.6672.1.S1_at      | 2 | 5.05  | Retrotransposon, LTR, Gypsy, "RLG_Derami_A_AY188333-1"  |
| 220 | TaAffx.6814.1.S1_at      | 2 | 6.40  | Retrotransposon, LTR, Copia, "RLC_WIS_B_consensus-1"    |
| 221 | TaAffx.70061.10.S1_at    | 2 | 4.51  | Retrotransposon, LTR, Gypsy, "RLG_Sumana_59e04-2"       |
| 222 | TaAffx.70061.16.S1_at    | 2 | 4.96  | Retrotransposon, LTR, Gypsy, "RLG_Sumaya_59e04-1"       |
| 223 | TaAffx.70061.29.S1_at    | 2 | 12.34 | Retrotransposon, LTR, Gypsy, "RLG_Sumana_59e04-2"       |
| 224 | TaAffx.70061.29.S1_x_at  | 2 | 10.89 | Retrotransposon, LTR, Gypsy, "RLG_Sumana_59e04-2"       |
| 225 | TaAffx.74416.2.S1_at     | 2 | 69.87 | Retrotransposon, LTR, Gypsy, "RLG_Sakura_10k23-4"       |
| 226 | TaAffx.80350.1.S1_at     | 2 | 10.29 | Retrotransposon, LTR, Gypsy, "RLG_Wilma_AY146588-3"     |
| 227 | TaAffx.80606.1.S1_at     | 2 | 12.57 | Retrotransposon, LTR, Gypsy, "RLG_Wilma_AY146588-3"     |
| 228 | TaAffx.80614.1.S1_at     | 2 | 6.43  | Retrotransposon, LTR, Gypsy, "RLG_Egug_EF067844-16"     |
| 229 | TaAffx.8194.1.S1_at      | 2 | 6.19  | DNA transposon, TIR, CACTA, "DTC_Caspar_consensus-1"    |
| 230 | TaAffx.83311.1.S1_at     | 2 | 5.24  | Retrotransposon, LTR, Gypsy, "RLG_Sumana_59e04-2"       |
| 231 | TaAffx.84020.1.S1_at     | 2 | 7.72  | Retrotransposon, LTR, Gypsy, "RLG_Romani_10k23-3"       |
| 232 | TaAffx.84028.1.S1_at     | 2 | 12.46 | Retrotransposon, LTR, Gypsy, "RLG_Sakura_10k23-4"       |
| 233 | TaAffx.84236.2.S1_at     | 2 | 5.23  | Retrotransposon, LTR, Gypsy, "RLG_Sabrina_D_AY146588-2" |
| 234 | TaAffx.84236.2.S1_x_at   | 2 | 4.92  | Retrotransposon, LTR, Gypsy, "RLG_Sabrina_D_AY146588-2" |
| 235 | TaAffx.84244.1.S1_at     | 2 | 4.34  | DNA transposon, TIR, CACTA, "DTC_TAT1_AF459088-1"       |
| 236 | TaAffx.84870.1.S1_at     | 2 | 4.90  | Retrotransposon, LTR, Gypsy, "RLG_Laura_609E6-1"        |
| 237 | TaAffx.85688.1.S1_at     | 2 | 7.08  | Retrotransposon, LTR, Gypsy, "RLG_Wilma_AY146588-3"     |
| 238 | TaAffx.86667.1.S1_at     | 2 | 4.82  | Retrotransposon, LTR, Gypsy, "RLG_Sumaya_116F2-1"       |
